# Supplementary material
Source: Royal Society of Chemistry journal article supplement (doi:10.1039/d6ta00091f)
Supplement: d6ta00091f1.pdf [file d6ta00091f1.pdf]

## Supporting Information

### **Modulating M-S Motifs of the Metallic Electrocatalyst with Low Overpotential for Hydrogen Evolution Reaction in Acidic Electrolyte**

Nannan Zhao<sup>a†\*</sup>, Fei Lin<sup>c†</sup>, Guobin Wen<sup>a\*</sup>, Na Tang<sup>b</sup>, Penggao Cheng<sup>b</sup>,  
Lei Zhang<sup>b</sup>, and Lifeng Liu<sup>c\*</sup>

<sup>[a]</sup> N. Zhao and G. Wen

College of Chemistry and Chemical Engineering

Hunan University

Changsha, Hunan 410082, China.

E-mail: [zhaonannan2023@hnu.edu.cn](mailto:zhaonannan2023@hnu.edu.cn), [gbwen@hnu.edu.cn](mailto:gbwen@hnu.edu.cn)

<sup>[b]</sup> N. Tang, P. Cheng and L. Zhang

Tianjin Key Laboratory of Brine Chemical Engineering and Resource Eco-utilization,

Tianjin University of Science & Technology, Tianjin 300457, China.

<sup>[c]</sup> F Lin and L Liu

Songshan Lake Materials Laboratory (SLAB), Dongguan 523808, P. R. China.

E-mail: [liu.lifeng@sslslab.org.cn](mailto:liu.lifeng@sslslab.org.cn)

Nannan Zhao and Fei Lin contributed equally to this work.

\*Corresponding author (Dr, N Zhao, Prof. Dr, G. Wen and Prof. Dr, Lifeng Liu).

## Table of contents

|                       | Captions                                                                                                                                                                                              | Page |
|-----------------------|-------------------------------------------------------------------------------------------------------------------------------------------------------------------------------------------------------|------|
| Supplementary Fig.S1  | The resolution SEM images of R-FeNiCoS.                                                                                                                                                               | S7   |
| Supplementary Fig.S2  | The images of systematically characterize the R-FeNiCoS as a function of reconstruction time and applied potential.                                                                                   | S8   |
| Supplementary Fig.S3  | XPS survey spectrum of (a) Ni 2p and (b) S 2p regions of R-FeNiCoS.                                                                                                                                   | S9   |
| Supplementary Fig.S4  | XPS survey spectrum of (a) Fe 2p and (b) Co 2p regions of R-FeNiCoS.                                                                                                                                  | S10  |
| Supplementary Fig.S5  | XPS survey spectrum of (a) Ni 2p and (b) S 2p regions of R-FeNiCoS and FeNiCoS.                                                                                                                       | S11  |
| Supplementary Fig.S6  | The Ni valence states of R-FeNiCoS and FeNiCoS fitted by Ni K-edge absorption energy at different potentials.                                                                                         | S12  |
| Supplementary Fig.S7  | Valence-band spectrum.                                                                                                                                                                                | S13  |
| Supplementary Fig.S8  | XANES spectra of (a) Fe K-edge and (b) Co K-edge.                                                                                                                                                     | S14  |
| Supplementary Fig.S9  | FT-EXAFS spectra of (a) Fe K-edge and (b) Co K-edge.                                                                                                                                                  | S15  |
| Supplementary Fig.S10 | Valence-band spectrum.                                                                                                                                                                                | S16  |
| Supplementary Fig.S11 | The calculated d-band center of R-FeNiCoS.                                                                                                                                                            | S17  |
| Supplementary Fig.S12 | The CV curves of (a) R-FeNiCoS, (b) carbon cloth in the non-Faraday reaction region at different scan rates of 10, 20, 30, 40, 50 and 60 mV s <sup>-1</sup> in 0.5 M H <sub>2</sub> SO <sub>4</sub> . | S18  |
| Supplementary Fig.S13 | Polarization curves of R-FeNiCoS before (red) and after (blue) long-time stability.                                                                                                                   | S19  |
| Supplementary Fig.S14 | Generated H <sub>2</sub> amounts for the assembled electrolyzer.                                                                                                                                      | S20  |
| Supplementary Fig.S15 | XRD patterns of the R-FeNiCoS before and after HER.                                                                                                                                                   | S21  |
| Supplementary Fig.S16 | LSV curves of R-FeNiCoS for HER in 0.5 M H <sub>2</sub> SO <sub>4</sub> + seawater.                                                                                                                   | S22  |
| Supplementary Fig.S17 | (a) Photograph of the R-FeNiCoS cathode.<br>(b) Photograph of the R-FeNiCoS cathode for HER in PEMWE device, using 0.5 M H <sub>2</sub> SO <sub>4</sub> in seawater as the electrolyte.               | S23  |
| Supplementary Fig.S18 | Polarization curves of the PEM electrolyse in 0.5 M H <sub>2</sub> SO <sub>4</sub> in seawater operated at 80 °C.                                                                                     | S24  |
| Supplementary Fig.S19 | Durability test of the PEMWE electrolyser using 0.5 M H <sub>2</sub> SO <sub>4</sub> in seawater as the electrolyte operated at 80 °C.                                                                | S25  |
| Supplementary Fig.S20 | Electrochemical cell for operando Raman measurements. The experimental set-up for operando Raman measurement. W.E., R.E. and                                                                          | S26  |

|                        |                                                                                                                                              |                 |
|------------------------|----------------------------------------------------------------------------------------------------------------------------------------------|-----------------|
|                        | C.E. stand for working electrode (R-FeNiCoS catalyst), reference electrode (Ag/AgCl) and counter electrode (carbon rods), respectively.      |                 |
| Supplementary Fig.S21  | The optimized structures of H* adsorbed on Ni site for R-FeNiCoS.                                                                            | S27             |
| Supplementary Fig.S22  | TOF curves of the corresponding of R-FeNiCoS electrodes for HER.                                                                             | S28<br>-<br>S29 |
| Supplementary Table S1 | XPS of R-FeNiCoS.                                                                                                                            | S28             |
| Supplementary Table S2 | Thermodynamic data used in the free energy analysis                                                                                          | S29             |
| Supplementary Table S3 | Summary of some recently reported representative HER non-precious electrocatalysts in acidic medium (0.5 M H <sub>2</sub> SO <sub>4</sub> ). | S30             |
| Supplementary Table S4 | Comparison of the performance of PEMWE with the non-noble metal cathodes.                                                                    | S31             |
| Supplementary Table S5 | Comparison of the performance of PEMWE with the non-noble metal anodes.                                                                      | S32             |
| Supplementary Table S6 | Summary of seawater splitting using transition-metal catalysts.                                                                              |                 |

## Methods

### 1.1 Materials

Carbon cloth (CC, 0.32 mm thickness, Electronic Materials Management Department), Nitric acid (HNO<sub>3</sub>, 36.0%-38.0%, Tianjin Jiangtian Chemical Technology Co., Ltd.), Sulfur powder (S, 99.5%, Aladdin), Ruthenium oxide (RuO<sub>2</sub>, 99%, Shanghai Aladdin Biochemical Technology Company), Platinum (Pt/C, nominally 20% on carbon black, Alfa Aesar) and Nafion solution (5%, DuPont) were used without further purification. Sodium chloride (NaCl, ≥99.5%), sulfuric acid (H<sub>2</sub>SO<sub>4</sub>, reagent grade) was purchased from Aldrich Chemical. All chemicals and reagents were used without any further purification.

### 1.2 Synthesis of catalysts

Initially, a piece of carbon cloth (CC, 1.0 cm × 2.0 cm) was treated in 3.0 M HNO<sub>3</sub> solution for 5 hours at 60 °C and cleaned several times with ethanol and ultrapure water.

Then, FeNiCoS were directly grown on the carbon cloth with various ratio of Ni, Co and Fe compound. FeNiCoS was first synthesized using the synthesized by a solvothermal method by controlling organic precursors growth. Mixing of the solution and carbon cloth was then transferred to Teflon-lined stainless-steel autoclave and maintained at 120 °C for 6 hours and then dried at 60 °C overnight. Then, the precursors were pyrolyzed in air for 2 h to gain FeNiCoO.

Next, the simple high-temperature sulfurization treatment. Typically, the FeNiCoS was loaded in a ceramic boat, and 1.0 g of sulfur powders was placed 2 cm away from the foam at the upstream side. Subsequently, the furnace was purged with high-purity Ar (99.9995%) for 1.0 h to get rid of air, heated to 550 °C at a ramping rate of 5 °C min<sup>-1</sup>, and held at the temperature for 1.5 h.

R-FeNiCoS is synthesized by subjecting the precursor FeNiCoS to a constant current density of 500 mA cm<sup>-2</sup> for 50 hours in 0.5 M H<sub>2</sub>SO<sub>4</sub> electrolyte or acidic seawater.

At last, R-FeNiCoS is synthesized by electrochemical reconstruction after 0, 10 and 50 hours chronoamperometry measurements at a certain potential, labeled as FeNiCoS, R<sub>10</sub>-FeNiCoS, and R-FeNiCoS, respectively.

### 1.3 Characterizations

The crystal phases were recorded using the X-ray diffraction by an X-ray powder diffractometer (Bruker D8 advance, Shimadzu Kyoto, Germany) with Cu K $\alpha$  radiation. The morphologies and composition of the samples were obtained using a field emission scanning electron microscopy (FESEM, Czech TESCAN MIRA LMS, China) and X-ray energy-dispersive spectroscopy (EDS) at an accelerating voltage of 20 kV. The phase structure transmission electron microscopy (TEM, JEOL JEM 2010F, Japan) was examined at 200 kV. The X-ray photoelectron spectroscopy (XPS, K-Alpha, USA) was used to detect the surface elemental composition. The Raman spectra was characterized using a confocal Raman microscope (LabRam HR800, Horiba Jobin Yvon, France) with a laser (532 nm) as the excitation source. Ultraviolet photoelectron spectroscopy (UPS) was performed on Thermo ESCALAB Xi+ equipped with ultraviolet photoelectron spectroscopy (Hel (21.22 eV)). Ex situ and operando Ni K-edge X-ray absorption near-edge structure (XANES) and extended X-ray absorption fine structure (EXAFS) experiments were carried out at the European Synchrotron Radiation Facility (ESRF), Swiss-Norwegian Beamline BM31, Grenoble, France. Athena and Artemis were used for processing the XAS data.

#### 1.4 Electrochemical measurements

The hydrogen evolution reaction (HER) activities were conducted at room temperature using a workstation (CS300, Wuhan Corrtest Instrument Corp., Ltd) in 0.5 M H<sub>2</sub>SO<sub>4</sub>+0.5 M NaCl. A standard three-electrode system was used, in which the synthesized catalysts as the working electrode, carbon rod served as the counter electrode, and a standard Hg/HgSO<sub>4</sub> electrode filled with 0.5 M H<sub>2</sub>SO<sub>4</sub> solution as the reference electrode. The effective area of the working electrode is 1.0 cm × 1.0 cm. The linear sweep voltammetry (LSV) was evaluated at a scan rate of 5 mV s<sup>-1</sup>, which was adjusted with 90% iR correction to minimize the influence of ohmic resistance. Electrochemical impedance spectroscopy (EIS) was carried out in the same configuration at an overpotential of 200 mV from 0.1 Hz to 100 kHz with an amplitude of 10 mV. All potentials in the work were converted to a reversible hydrogen electrode by adding -0.21473 V based on the Nernst equation ( $E_{\text{RHE}}=E_{\text{Hg/HgSO}_4}+0.059\times\text{pH}+0.14$ ). The overpotential ( $\eta$ ) of HER was calculated according to the following formula:  $\eta$  (V) =  $E_{\text{RHE}}$  - 0 V. Measurements of electrochemical active surface area (ECSA) were estimated following equation:  $\text{ECSA} = C_{\text{dl}}/C_s$ , where the value of  $C_s$  is about 40  $\mu\text{F cm}^{-2}$ . The double-layer capacitance ( $C_{\text{dl}}$ ) from the CV curves at the five scan rates (60, 70, 80, 90, and 100 mV s<sup>-1</sup>) in the potential range from 0.72 V ~ 0.82 V (vs.RHE), which is equivalent to the slopes of linear plots from the current density at 0.90 V. The stability of the electrode was measured by applying a constant potential to achieve a current density of 100 mA cm<sup>-2</sup> for 100 hours. The oxygen generated from a couple of two-electrode systems at 100 mA cm<sup>-2</sup> was collected via the drainage method.

#### 1.5 PEM Measurement.

To prepare the membrane electrode assembly (MEA), the Nafion 117 membrane (N117, Dupont) was sequentially treated with 3 wt% H<sub>2</sub>O<sub>2</sub>, 0.5 M H<sub>2</sub>SO<sub>4</sub>, and distilled water at 80 °C for 1 hour each. After cooling to room temperature, the treated N117 membrane was stored in distilled water. For the PEM cell, R-FeNiCoS catalyst or commercial Pt/C (40 wt%) was used as the cathode catalyst, and commercial IrO<sub>2</sub> was used as the anode catalyst.

The PEM electrolytic cell was operated at both room temperature and 80 °C, using 0.5 M H<sub>2</sub>SO<sub>4</sub> electrolyte solution circulated at a flow rate of 20 mL min<sup>-1</sup> via a peristaltic pump. The performance of the PEM electrolysis cell was evaluated by measuring the polarization curve (LSV) from 0 to 2 A cm<sup>-2</sup> using an electrochemical workstation. The stability was assessed by applying a constant potential current method at 500 mA cm<sup>-2</sup> for 100 hours.

#### 1.6 DFT Calculations

Density Functional Theory (DFT) simulations were studied by employing Cambridge Sequential Total Energy Package (CASTEP) module implemented in Material Studio. In CASTEP module, to account for exchange-correlation effects, the generalized gradient approximation (GGA) with the Perdew-Burke-Ernzerh of (PBE) exchange-correlation functional model was used in the calculations. The cut off energy of the plane wave basis set is 550 eV, and a Monkhorst mesh of 2×2×4 was considered in K-sampling. All calculations for the slab model were evaluated on a 1×1×1 Gamma-centered Monkhorst-Pack k-point grid. For the geometric structure optimization, the criterions until energy change, max force on each atom, stress and max displacement are less than 10<sup>-5</sup> eV/atom, 0.03 eV/Å, 0.05 GPa and 10<sup>-3</sup> Å, respectively. The spin-polarized calculations were

performed to relax the structures until the force and energy on each atom is smaller than  $1.0 \times 10^{-5}$  eV/Å. In our calculations, the hydrogen intermediates were adsorbed on the R-FeNiCoS (020) surface following a previous method.

## 2. Supplementary Figures

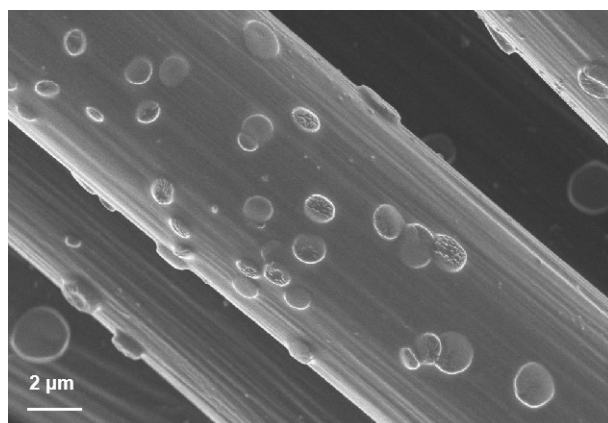

**Supplementary Fig.S1.** The resolution SEM images of R-FeNiCoS.

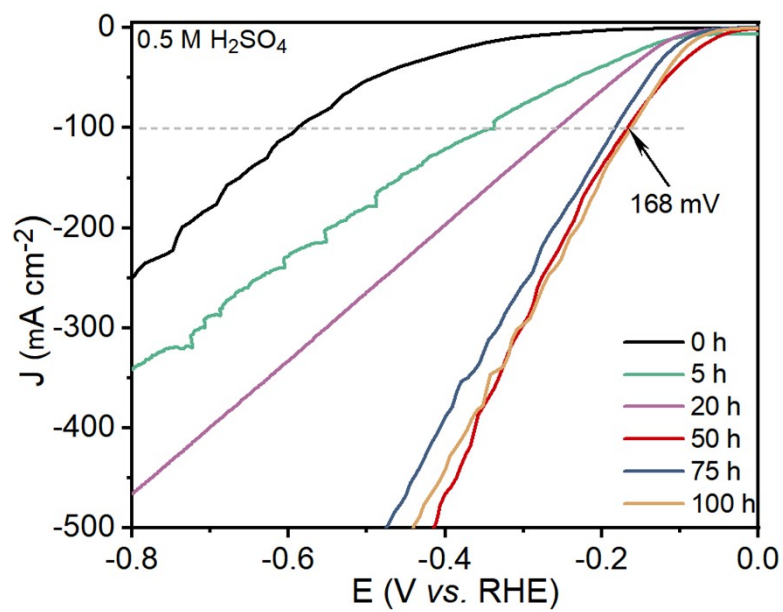

**Supplementary Fig.S2** The images of systematically characterize the R-FeNiCoS as a function of reconstruction time and applied potential.

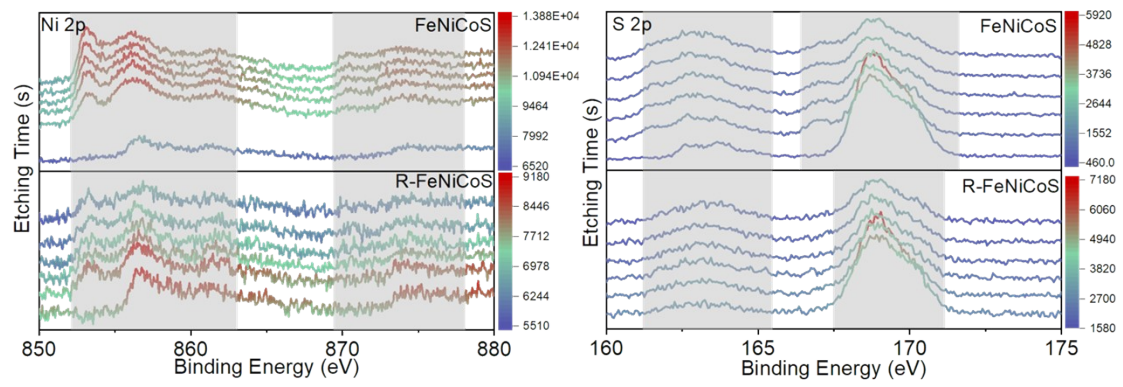

**Supplementary Fig.S3** XPS survey spectrum of (a) Ni 2p and (b) S 2p regions of R-FeNiCoS.

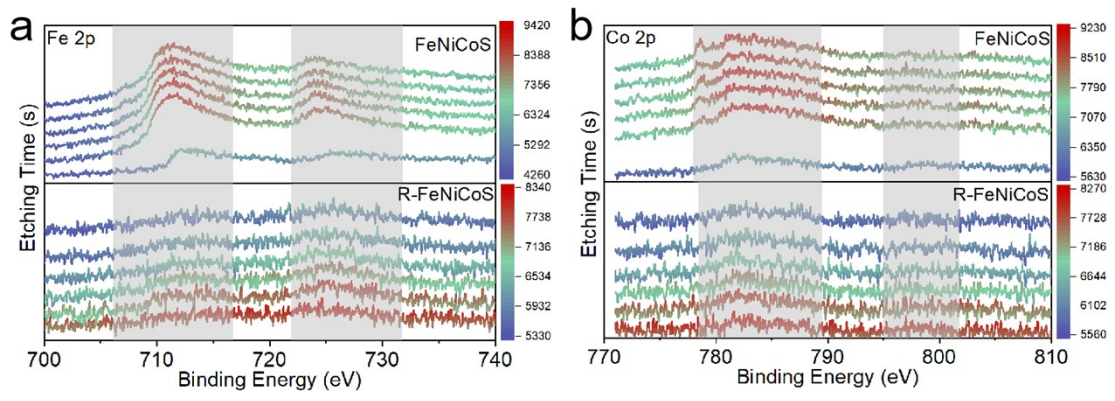

**Supplementary Fig.S4** XPS survey spectrum of (a) Fe 2p and (b) Co 2p regions of R-FeNiCoS.

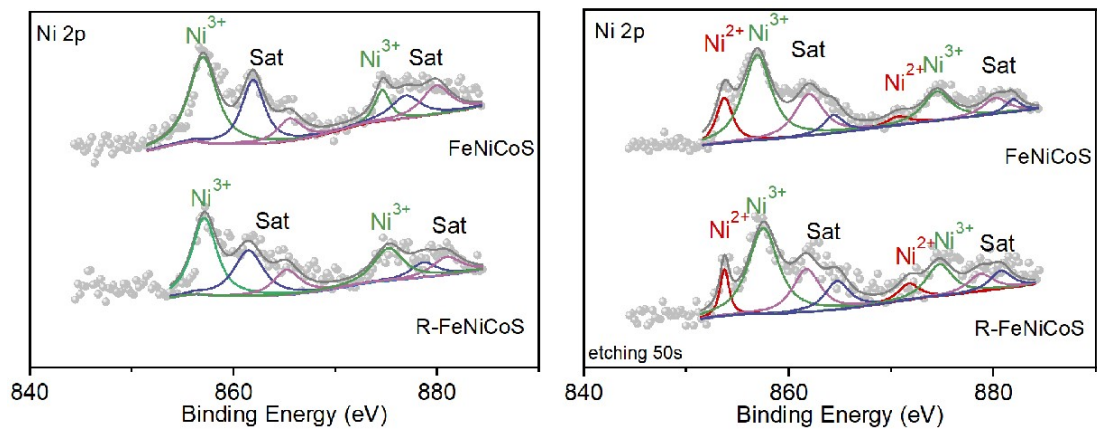

**Supplementary Fig.S5** XPS survey spectrum of Ni 2p regions (a) in etching 0s and (b) in etching 50s of R-FeNiCoS and FeNiCoS.

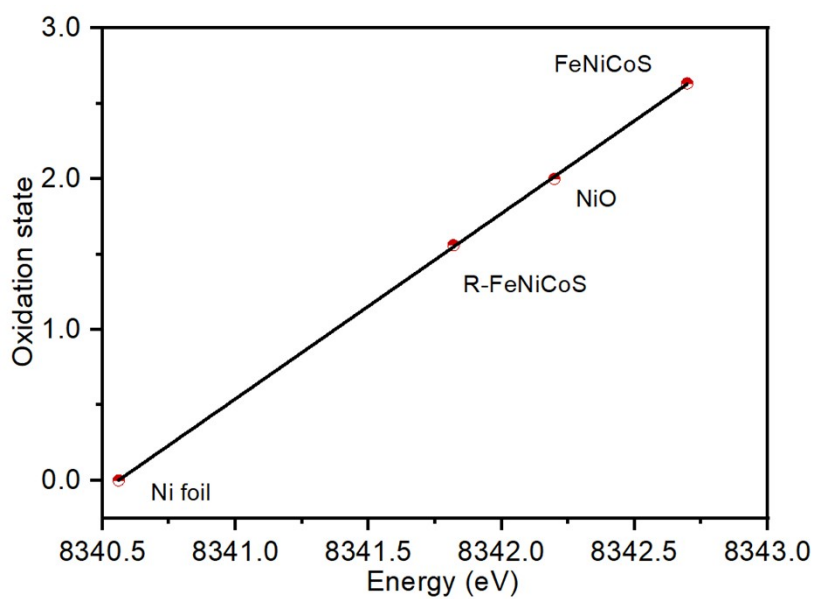

**Supplementary Fig.S6** The Ni valence states of R-FeNiCoS and FeNiCoS fitted by Ni K-edge absorption energy at different potentials.

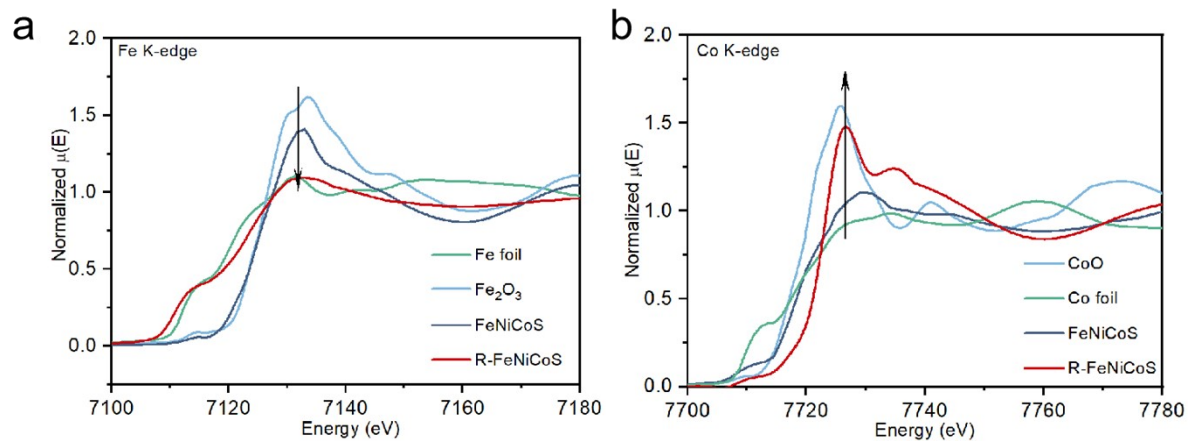

**Supplementary Fig.S7** XANES spectra of (a) Fe K-edge and (b) Co K-edge.

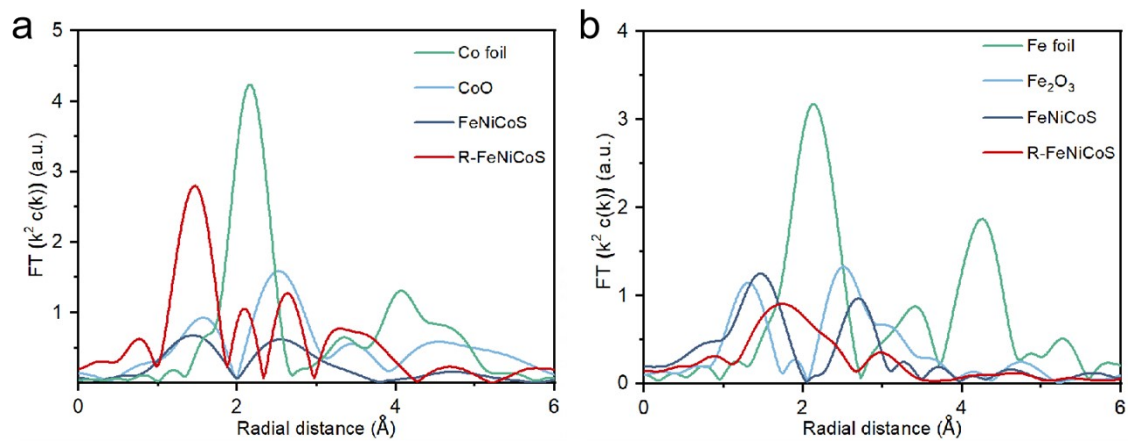

**Supplementary Fig.S8** FT-EXAFS spectra of (a) Fe K-edge and (b) Co K-edge.

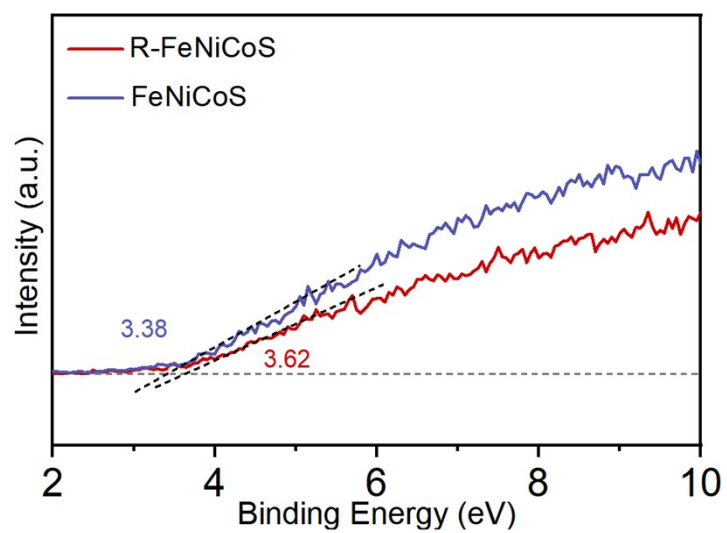

**Supplementary Fig.S9** Valence-band spectrum.

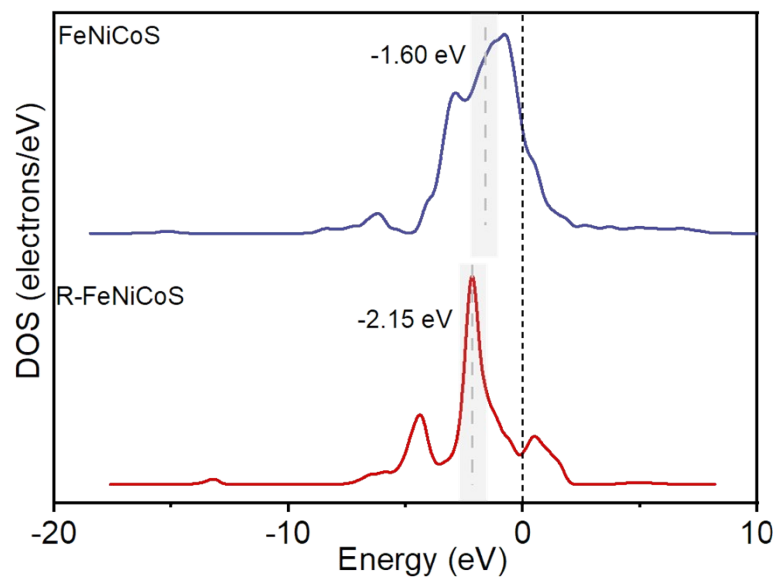

**Supplementary Fig.S10** The calculated d-band center of R-FeNiCoS.

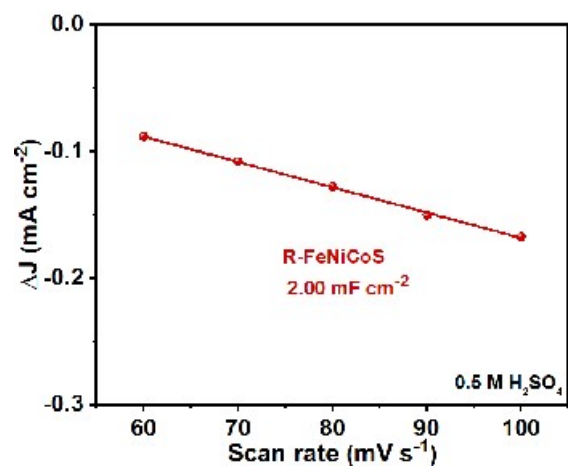

**Supplementary Fig.S11** The CV curves of (a) R-FeNiCoS, (b) carbon cloth in the non-Faraday reaction region at different scan rates of 10, 20, 30, 40, 50 and 60 mV s<sup>-1</sup> in 0.5 M H<sub>2</sub>SO<sub>4</sub>.

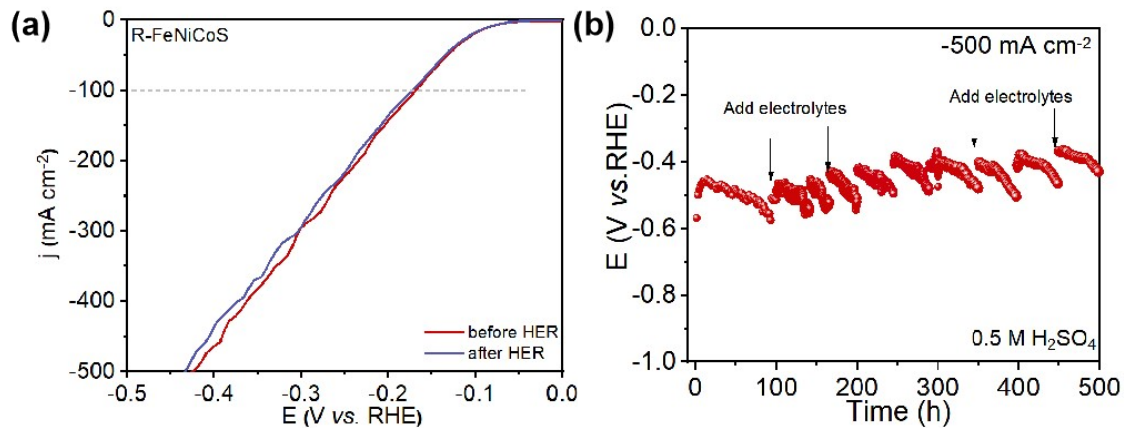

**Supplementary Fig.S12 (a)** Polarization curves of R-FeNiCoS before (red) and after (blue) long-time stability. **(b)** R-FeNiCoS at constant current densities for HER in 0.5 M H<sub>2</sub>SO<sub>4</sub> electrolyte. R-FeNiCoS at constant current densities of 500 mA cm<sup>-2</sup> for 500 hours for HER in 0.5 M H<sub>2</sub>SO<sub>4</sub> electrolyte.

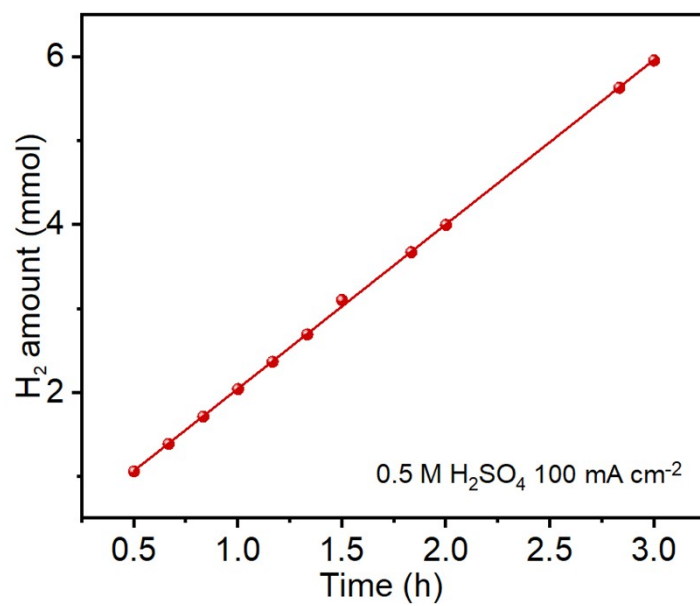

**Supplementary Fig.S13** Generated H<sub>2</sub> amounts for the assembled electrolyzer.

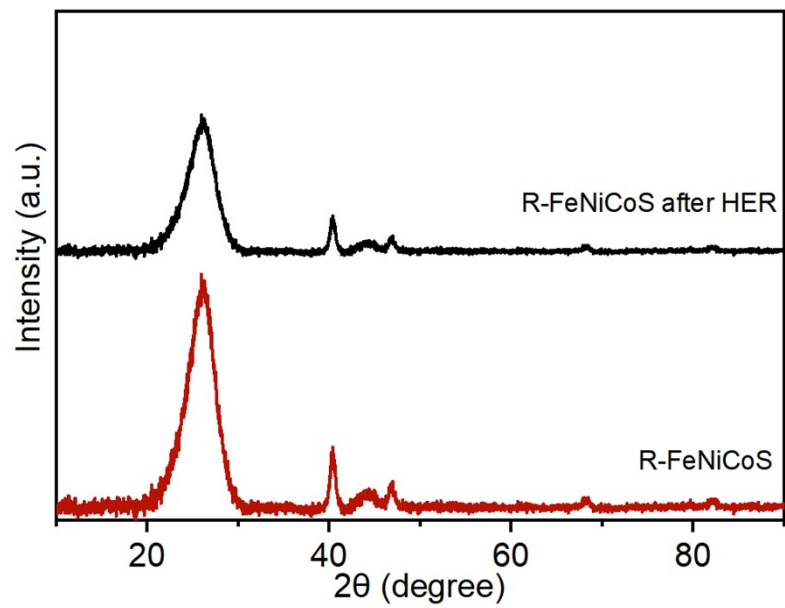

**Supplementary Fig.S14** XRD patterns of the R-FeNiCoS before and after HER.

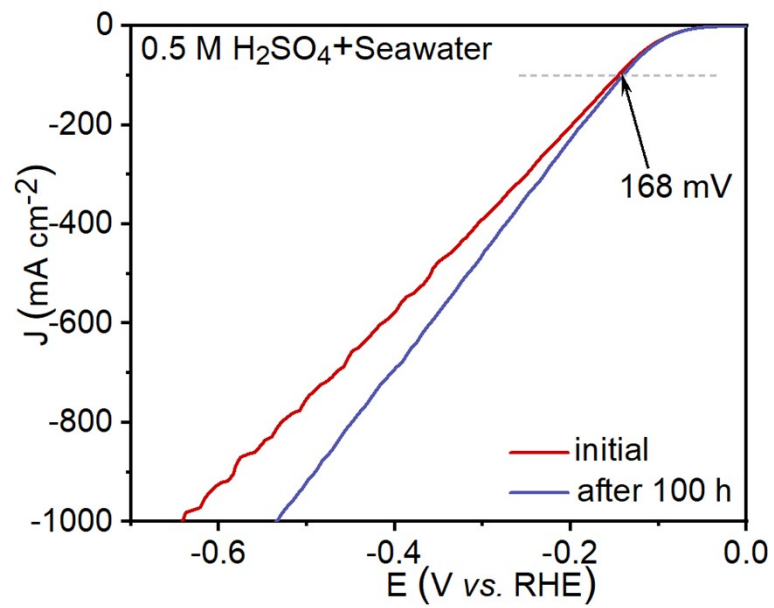

**Supplementary Fig.S15** LSV curves of R-FeNiCoS for HER in 0.5 M H<sub>2</sub>SO<sub>4</sub> + seawater.

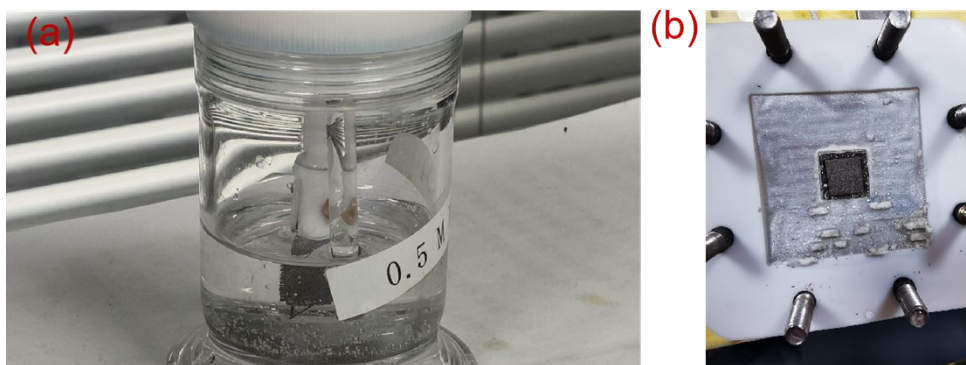

**Supplementary Fig.S16** (a) Photograph of the R-FeNiCoS cathode. (b) Photograph of the R-FeNiCoS cathode for HER in PEMWE device, using 0.5 M  $\text{H}_2\text{SO}_4$  in seawater as the electrolyte.

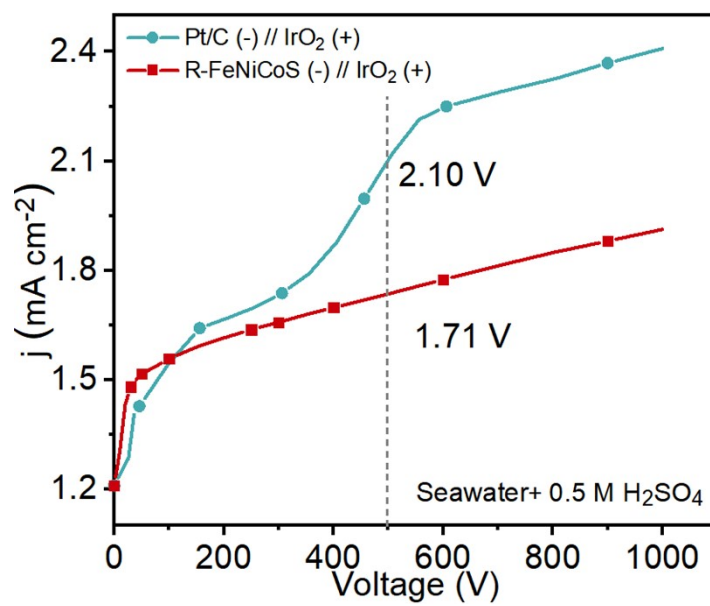

**Supplementary Fig.S17** Polarization curves of the PEM electrolyser using 0.5 M H<sub>2</sub>SO<sub>4</sub> in seawater as the electrolyte operated at 80 °C.

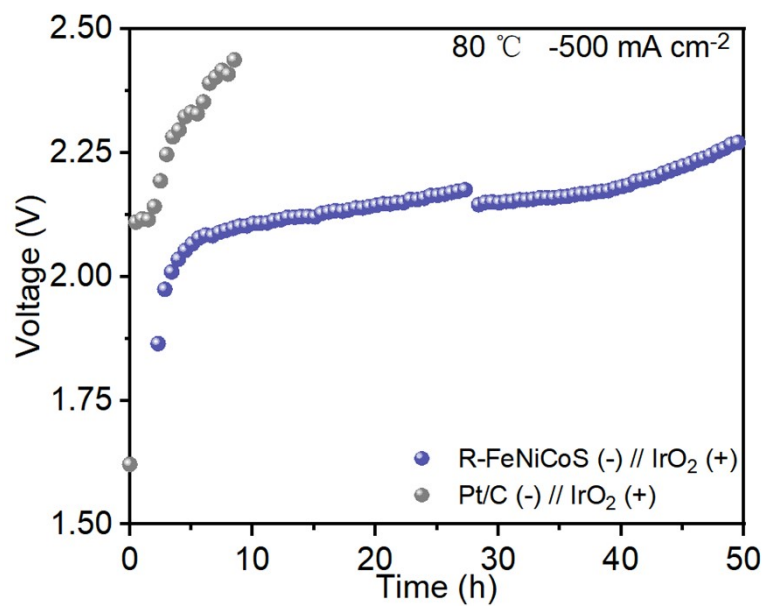

**Supplementary Fig.S18** Durability test of the PEMWE electrolyser using 0.5 M H<sub>2</sub>SO<sub>4</sub> in seawater as the electrolyte operated at 80 °C.

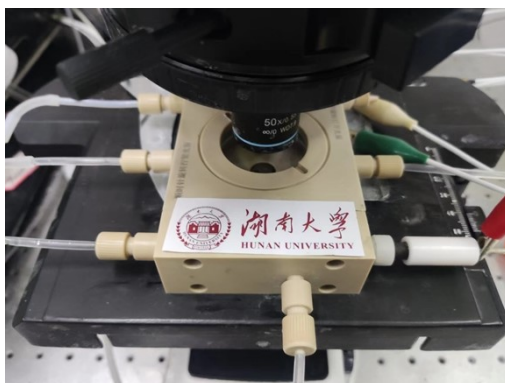

**Supplementary Fig.S20 Electrochemical cell for operando Raman measurements.**

The experimental set-up for operando Raman measurement. W.E., R.E. and C.E. stand for working electrode (R-FeNiCoS catalyst), reference electrode (Ag/AgCl) and counter electrode (carbon rods), respectively.

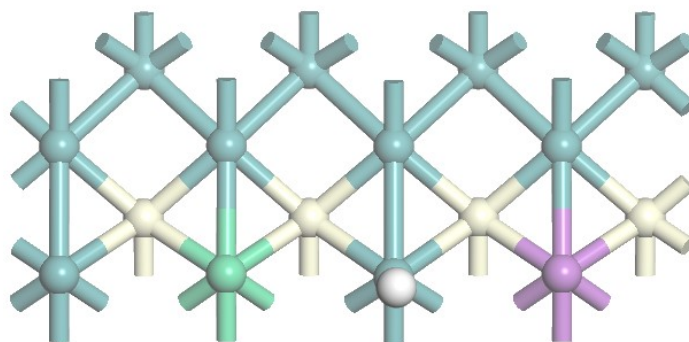

**Supplementary Fig.S21** The optimized structures of H<sup>+</sup> adsorbed on Ni site for R-FeNiCoS.

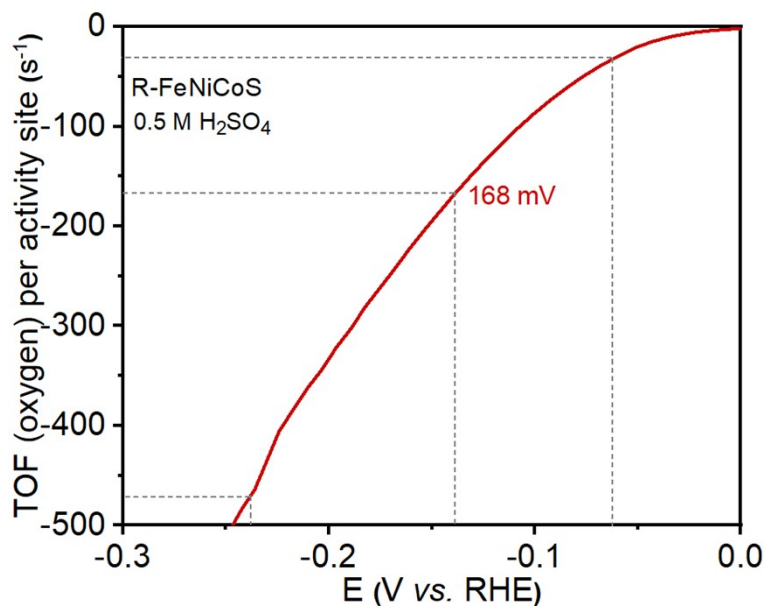

**Supplementary Fig.S22** TOF curves of the corresponding of R-FeNiCoS electrodes for HER.

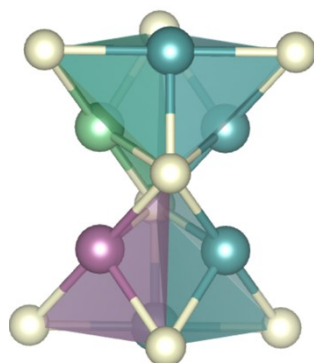

Volume: 206.076 Å<sup>3</sup>

Contains: 4 Ni, Co, Fe, 8 S

In which Ni:blue atoms, Co: purple atoms, Fe: green atoms, S: orange atoms

**Calculation details of ECSA:**

$$\text{ECSA} = C_{\text{dl}}/C_{\text{s}}, C_{\text{s}}=40 \mu\text{F cm}^{-2}$$

$$\text{ECSA}_{\text{R-FeNiCoS/CC}} = 2.00 \text{ mF cm}^{-2}/40 \mu\text{F cm}^{-2} = 50 \text{ cm}^{-2} \text{ ECSA}$$

**The Turnover Frequency (TOF) Calculation** is defined as the rate of evolved molecular H<sub>2</sub> per surface active site per second, which can be calculated by the following equation:

$$TOF(s^{-1}) = \frac{\text{number of hydrogen turnovers} / \text{cm}^2 \text{ of geometric area}}{\text{number of active sites/cm}^2 \text{ of geometric area}} \quad \text{Eq. (A.1)}$$

The number of TOF for HER was calculated from the current density according to:

$$\text{number of hydrogen turnover} = (j \frac{\text{mA}}{\text{cm}^2}) (\frac{1C/s}{1000\text{mA}}) (\frac{1\text{mole}^-}{96485.3C}) (\frac{1\text{molH}_2}{2\text{mole}^-}) \times 6.023 \times 10^{23} \quad \text{Eq. (A.2)}$$

At an overpotential of 62, 168, and 238 mV the R-FeNiCoS reached a current density of 10, 100, and 500 mA cm<sup>-2</sup>, respectively.

Number of hydrogen turnover for R-FeNiCoS at 62 mV overpotential

$$\text{number of hydrogen turnover} = (10 \frac{\text{mA}}{\text{cm}^2}) (\frac{1C/s}{1000\text{mA}}) (\frac{1\text{mole}^-}{96485.3C}) (\frac{1\text{molH}_2}{2\text{mole}^-}) \times 6.023 \times 10^{23} = 3.12 \times 10^{16} (\frac{1/s}{\text{cm}^2})$$

number of hydrogen turnover for R-FeNiCoS at 168 mV overpotential

$$\text{number of hydrogen turnover} = (100 \frac{\text{mA}}{\text{cm}^2}) (\frac{1C/s}{1000\text{mA}}) (\frac{1\text{mole}^-}{96485.3C}) (\frac{1\text{molH}_2}{2\text{mole}^-}) \times 6.023 \times 10^{23} = 3.12 \times 10^{17} (\frac{1/s}{\text{cm}^2})$$

number of hydrogen turnover for R-FeNiCoS at 238 mV overpotential

$$\text{number of hydrogen turnover} = (500 \frac{\text{mA}}{\text{cm}^2}) (\frac{1C/s}{1000\text{mA}}) (\frac{1\text{mole}^-}{96485.3C}) (\frac{1\text{molH}_2}{2\text{mol e}^-}) \times 6.023 \times 10^{23} = 1.56 \times 10^{18} (\frac{1/s}{\text{cm}^2})$$

The nature of the active sites is not yet understood, we thus estimated all surface atoms as active sites based on Wu's work [1], which may underestimate the real TOF. The active sites can be calculated using following equations and corresponding the unit cell (volume of 89.9613 Å<sup>3</sup>) of R-FeNiCoS crystal structure (Ni, Fe, Co and S is considered as the active site) shown in Figure S8:

$$\text{Active sites} = (\frac{4 \text{ atom / unit cell}}{89.9613 / \text{unit cell}})^{2/3} = 0.13 \times 10^{14} \text{ atom cm}^2_{\text{real}} \quad \text{Eq. (A.3)}$$

$$TOF(n_{62}) = \frac{3.12 \times 10^{16} \frac{\text{mA}}{\text{cm}^2}}{\text{surface sites} \times ECAS} = \frac{3.12 \times 10^{16} \frac{\text{mA}}{\text{cm}^2}}{0.13 \times 10^{14} \times 50} = 0.48 \times 10^2 \text{ s}^{-1}$$

$$TOF(n_{168}) = \frac{3.12 \times 10^{17} \frac{\text{mA}}{\text{cm}^2}}{\text{surface sites} \times ECAS} = \frac{3.12 \times 10^{17} \frac{\text{mA}}{\text{cm}^2}}{0.13 \times 10^{14} \times 50} = 0.48 \times 10^3 \text{ s}^{-1}$$

$$TOF(n_{238}) = \frac{1.56 \times 10^{18} \frac{\text{mA}}{\text{cm}^2}}{\text{surface sites} \times ECAS} = \frac{1.56 \times 10^{18} \frac{\text{mA}}{\text{cm}^2}}{0.13 \times 10^{14} \times 50} = 0.24 \times 10^4 \text{ s}^{-1}$$

**Supplementary Table S1. XPS of R-FeNiCoS**

| <b>Elements</b> | <b>Atomic %</b> |
|-----------------|-----------------|
| Fe              | 3.66            |
| Ni              | 9.20            |
| Co              | 1.88            |
| S               | 85.26           |

**Supplementary Table S2.** Thermodynamic data used in the free energy analysis

| Active Sites | E       | ZPE      | -TS         | $\Delta G$ |
|--------------|---------|----------|-------------|------------|
| Ni site      | -1.6509 | 0.186398 | -0.00393658 | -1.4685    |
| Co site      | -1.6821 | 0.171069 | -0.01103494 | -1.5221    |
| Fe site      | -1.6717 | 0.149058 | -0.00105194 | -1.5237    |
| S site       | -1.6412 | 0.160484 | -0.02405754 | -1.5048    |

**Supplementary Table S3.** Summary of some recently reported representative HER non-precious electrocatalysts in acidic medium (0.5 M H<sub>2</sub>SO<sub>4</sub>).

| Catalyst                                 | Media                                | $\eta_j=10 \text{ mA cm}^{-2}$ | Tafel slope (mV dec <sup>-1</sup> ) | Ref       |
|------------------------------------------|--------------------------------------|--------------------------------|-------------------------------------|-----------|
| R-FeNiCoS                                | 0.5 M H <sub>2</sub> SO <sub>4</sub> | 62                             | 71                                  | this work |
| Ni/Fe <sub>3</sub> C                     | 0.5 M H <sub>2</sub> SO <sub>4</sub> | 112                            | 206                                 | 1         |
| Ni/VC                                    | 0.5 M H <sub>2</sub> SO <sub>4</sub> | 111                            | 86                                  |           |
| CoSe <sub>2</sub> /CoP                   | 0.5 M H <sub>2</sub> SO <sub>4</sub> | 65                             | 54                                  | 2         |
| MoO <sub>2</sub> /MoS <sub>2</sub> /C    | 0.5 M H <sub>2</sub> SO <sub>4</sub> | 77                             | 41                                  | 3         |
| MoP/Mo <sub>2</sub> N                    | 0.5 M H <sub>2</sub> SO <sub>4</sub> | 91                             | 78                                  | 4         |
| W <sub>2</sub> S <sub>3</sub>            | 0.5 M H <sub>2</sub> SO <sub>4</sub> | 75                             | 36                                  | 5         |
| Mo <sub>2</sub> CT <sub>x</sub> :Co      | 0.5 M H <sub>2</sub> SO <sub>4</sub> | 180                            | 59                                  | 6         |
| P-MoP/Mo <sub>2</sub> N                  | 0.5 M H <sub>2</sub> SO <sub>4</sub> | 89                             | 53                                  | 7         |
| MoS <sub>x</sub> Cl                      | 0.5 M H <sub>2</sub> SO <sub>4</sub> | 150                            | 48                                  | 8         |
| WS <sub>1.14</sub> Se <sub>0.86</sub>    | 0.5 M H <sub>2</sub> SO <sub>4</sub> | 80                             | 85                                  | 9         |
| MoS <sub>2</sub> /CoSe <sub>2</sub>      | 0.5 M H <sub>2</sub> SO <sub>4</sub> | 75                             | 36                                  | 10        |
| M-CoSe <sub>1.28</sub> S <sub>0.72</sub> | 0.5 M H <sub>2</sub> SO <sub>4</sub> | 67                             | 50                                  | 11        |
| Ni-doped FeP/C                           | 0.5 M H <sub>2</sub> SO <sub>4</sub> | 72                             | 54                                  | 12        |
| NiCu                                     | 0.5 M H <sub>2</sub> SO <sub>4</sub> | 81                             | 87.4                                | 13        |

**Supplementary Table S4.** Comparison of the performance of PEMWE with the non-noble metal cathodes.

| Catalyst                                                     | Current (mA cm <sup>-2</sup> ) | Cell Temp (°C) | Cell voltage (V) |                  |
|--------------------------------------------------------------|--------------------------------|----------------|------------------|------------------|
| R-FeNiCoS    IrO <sub>2</sub>                                | 1000                           | 80             | 1.81             | <b>this work</b> |
| W <sub>2</sub> S <sub>3</sub>    IrO <sub>2</sub>            | 1000                           | 60             | 1.73             | 5                |
| M-CoSe <sub>1.28</sub> S <sub>0.72</sub>    IrO <sub>2</sub> | 1000                           | 60             | 1.79             | 11               |
| CoP    IrO <sub>2</sub>                                      | 1000                           | 50             | 2.05             | 14               |

**Supplementary Table S5.** Comparison of the performance of PEMWE with the non-noble metal anodes.

| Catalyst                                 | Current (mA cm <sup>-2</sup> ) | Cell Temp (°C) | Cell voltage (V) |    |
|------------------------------------------|--------------------------------|----------------|------------------|----|
| W-Co <sub>3</sub> O <sub>4</sub>    Pt/C | 500                            | 50             | 1.72             | 15 |
|                                          | 1000                           |                | 1.83             |    |
| CoFeNiMoWTe  Pt/C                        | 10                             | 70             | 1.63             | 16 |
| LD-B/RuO <sub>2</sub>    Pt/C            | 500                            | 80             | 1.53             | 17 |
|                                          | 1000                           |                | 1.63             |    |
| γ-MnO <sub>2</sub>    Pt/C               | 1000                           | 80             | 2.00             | 18 |

**Supplementary Table S6. Summary of seawater splitting using transition-metal catalysts.**

| Electrocatalyst                        | Electrolyte                       | Overpotential (mV)                                                     | Ref. |
|----------------------------------------|-----------------------------------|------------------------------------------------------------------------|------|
| Ni <sub>2</sub> P-Fe <sub>2</sub> P/NF | 1.0 M KOH                         | 261 ( at 100 mA/cm <sup>2</sup> )                                      | 19   |
|                                        |                                   | 337 ( at 1000 mA/cm <sup>2</sup> )                                     |      |
|                                        | 1.0 M KOH+seawater                | 305 ( at 100 mA/cm <sup>2</sup> )                                      |      |
|                                        |                                   | 431 ( at 1000 mA/cm <sup>2</sup> )                                     |      |
| NiFe/NiS-Ni                            | 1.0 M KOH                         | 1.72V ( at 400 mA/cm <sup>2</sup> )                                    | 20   |
|                                        | 6.0 M KOH+1.5 M NaCl              | 2.1V ( at 400 mA/cm <sup>2</sup> )                                     |      |
| NiMoN/NiMoN                            | 1.0 M KOH                         | 277 ( at 100 mA/cm <sup>2</sup> )                                      | 21   |
|                                        |                                   | 337 ( at 500 mA/cm <sup>2</sup> )                                      |      |
|                                        | 1.0 M KOH+0.5 M NaCl              | 286 ( at 100 mA/cm <sup>2</sup> )<br>347 ( at 500 mA/cm <sup>2</sup> ) |      |
| 1.0 M KOH+Seawater                     | 307 ( at 100 mA/cm <sup>2</sup> ) | 22                                                                     |      |
|                                        | 369 ( at 500 mA/cm <sup>2</sup> ) |                                                                        |      |
|                                        | 398 ( at 1000mA/cm <sup>2</sup> ) |                                                                        |      |
| NiCoFeP                                | 6.0 M KOH+2.8 M NaCl              | 272 ( at 100 mA/cm <sup>2</sup> )                                      | 22   |

|                                                                           |                                      |                                                                                                          |    |
|---------------------------------------------------------------------------|--------------------------------------|----------------------------------------------------------------------------------------------------------|----|
|                                                                           |                                      |                                                                                                          |    |
| h-Co <sub>0.34</sub> Fe <sub>0.33</sub> Ni <sub>0.33</sub> -LDH           | 1.0 M KOH                            | 195 (at 10 mA/cm <sup>2</sup> )                                                                          | 23 |
| CoP/CoMoP                                                                 | 0.5 M H <sub>2</sub> SO <sub>4</sub> | $\eta_{10\text{mA}/\text{cm}^2}=72\text{mV}$                                                             | 24 |
| FeP-Ni/NF                                                                 | 1.0 M KOH                            | 218 (at 10 mA/cm <sup>2</sup> )                                                                          | 25 |
| H-FeNiP                                                                   | 1.0 M KOH                            | 252 (at 10 mA/cm <sup>2</sup> )                                                                          | 26 |
| NPNS                                                                      | 1.0 M KOH                            | 87 (at 10 mA/cm <sup>2</sup> )                                                                           | 27 |
|                                                                           | Neutral seawater media               | 144 (at 10 mA/cm <sup>2</sup> )                                                                          |    |
|                                                                           | 0.5 M H <sub>2</sub> SO <sub>4</sub> | 66 (at 10 mA/cm <sup>2</sup> )                                                                           |    |
| CrMnFeCoNiS <sub>x</sub>                                                  |                                      | $\eta_{100\text{mA}/\text{cm}^2}=295\text{mV}$                                                           | 28 |
| Ni <sub>0.8</sub> Fe <sub>0.2</sub> -AHNA                                 | 1.0 M KOH                            | 190 (at 100 mA/cm <sup>2</sup> )<br>248 (at 500 mA/cm <sup>2</sup> )<br>258 (at 1000mA/cm <sup>2</sup> ) | 29 |
| Zn <sub>0.4</sub> Ni <sub>0.6</sub> Co <sub>2</sub> O <sub>4</sub> /NCNTs | 0.1 M KOH                            | $E_{10\text{mA}/\text{cm}^2}=1.64\text{ mV}$                                                             | 30 |
| Mn <sub>0.52</sub> Fe <sub>0.71</sub> Ni-MOF-74                           | 1.0 M KOH                            | $\eta_{100\text{mA}/\text{cm}^2}=267\text{mV}$                                                           | 31 |

|                                                         |                      |                                                                                                                                                                                          |    |
|---------------------------------------------------------|----------------------|------------------------------------------------------------------------------------------------------------------------------------------------------------------------------------------|----|
| (Ni <sub>0.66</sub> Fe <sub>0.33</sub> ) <sub>2</sub> P | 1.0 M KOH            | $\eta_{10\text{mA/cm}^2}=182\text{mV}$<br>$\eta_{50\text{mA/cm}^2}=280\text{mV}$<br>$\eta_{100\text{mA/cm}^2}=325\text{mV}$                                                              | 32 |
| NiFe-LDH                                                | 1.0 M KOH            | $\eta_{10\text{mA/cm}^2}=324\text{mV}$<br>$\eta_{100\text{mA/cm}^2}=430\text{mV}$                                                                                                        | 33 |
| Ni-doped FeOOH                                          | 1.0 M KOH+Seawater   | $\eta_{100\text{mA/cm}^2}=301\text{ mV}$                                                                                                                                                 |    |
| 0.5Fe-NiCo <sub>2</sub> O <sub>4</sub> @CC              | 1.0 M KOH            | $\eta_{10\text{ mA/cm}^2}=258\text{ mV}$                                                                                                                                                 | 34 |
|                                                         | 1.0 M KOH+0.5 M NaCl | $\eta_{10\text{ mA/cm}^2}=273\text{ mV}$                                                                                                                                                 |    |
|                                                         | 1.0 M KOH+Seawater   | $\eta_{10\text{ mA/cm}^2}=293\text{ mV}$                                                                                                                                                 |    |
| S-(Ni,Fe)OOH                                            | 1.0 M KOH            | $\eta_{100\text{ mA/cm}^2}=229\text{ mV},$<br>$\eta_{500\text{ mA/cm}^2}=281\text{ mV} \cdot$<br>$\eta_{500\text{ mA/cm}^2}=328\text{ mV}$<br>$\eta_{1000\text{ mA/cm}^2}=355\text{ mV}$ | 35 |
|                                                         | 1.0 M KOH+0.5 M NaCl | $\eta_{100\text{ mA/cm}^2}=278\text{ mV},$<br>$\eta_{500\text{ mA/cm}^2}=339\text{mV}$<br>$\eta_{1000\text{ mA/cm}^2}=378\text{ mV}$                                                     |    |
|                                                         | 1.0 M KOH+Seawater   | $\eta_{100\text{ mA/cm}^2}=300\text{ mV}$<br>$\eta_{500\text{ mA/cm}^2}=398\text{ mV}$<br>$\eta_{1000\text{ mA/cm}^2}=492\text{ mV}$                                                     |    |
| MoOx@NCHSs-750                                          | 1.0 M KOH            | $\eta_{10\text{ mA/cm}^2}=160\text{ mV}$                                                                                                                                                 |    |

|                                                |                                      |                                                                                                   |    |
|------------------------------------------------|--------------------------------------|---------------------------------------------------------------------------------------------------|----|
| MoOx@NCHSs-800                                 |                                      | $\eta_{10 \text{ mA/cm}^2} = 144 \text{ mV}$                                                      |    |
| MoOx@NCHSs-900                                 |                                      | $\eta_{10 \text{ mA/cm}^2} = 92 \text{ mV}$                                                       |    |
| Ni <sub>3</sub> Bi <sub>2</sub> S <sub>2</sub> | 1.0 M KOH                            | $\eta_{10 \text{ mA/cm}^2} = 127 \text{ mV}$                                                      |    |
|                                                | 1.0 M KOH+0.5 M NaCl                 | $\eta_{100 \text{ mA/cm}^2} = 390 \text{ mV}$                                                     | 36 |
| NiFe-MOF/NF                                    | 1.0 M KOH                            | $\eta_{10 \text{ mA/cm}^2} = 206 \text{ mV}$ ,<br>$\eta_{100 \text{ mA/cm}^2} = 232.7 \text{ mV}$ | 37 |
| N-WS <sub>2</sub> /Ni <sub>3</sub> FeN         | 1.0 M KOH                            | $\eta_{100 \text{ mA/cm}^2} = 240 \text{ mV}$<br>$\eta_{500 \text{ mA/cm}^2} = 285 \text{ mV}$    | 38 |
| CoZn MOF/CC                                    | 1.0 M KOH                            | $\eta_{10 \text{ mA/cm}^2} = 287$                                                                 | 39 |
| NiFeO <sub>x</sub>                             | 1.0 M KOH                            | $\eta_{20 \text{ mA/cm}^2} = 230 \text{ mV}$                                                      | 40 |
| Pt/Ni-MOF-C                                    | 1.0 M KOH                            | $\eta_{10 \text{ mA/cm}^2} = 66 \text{ mV}$                                                       | 41 |
|                                                | 0.5 M H <sub>2</sub> SO <sub>4</sub> | $\eta_{100 \text{ mA/cm}^2} = 28 \text{ mV}$                                                      |    |
| FeP/Ni <sub>2</sub> P                          | 1.0 M KOH                            | $\eta_{10 \text{ mA/cm}^2} = 154 \text{ mV}$                                                      | 42 |
| Co(OH) <sub>2</sub> -ZIF-L/NF-40               | 0.1 M KOH                            | $\eta_{100 \text{ mA/cm}^2} = 290 \text{ mV}$ ,<br>$\eta_{500 \text{ mA/cm}^2} = 359 \text{ mV}$  | 43 |
| NiFeO <sub>x</sub> H <sub>y</sub> -PN          | 1.0 M KOH                            | $\eta_{100 \text{ mA/cm}^2} = 265 \text{ mV}$<br>$\eta_{1000 \text{ mA/cm}^2} = 326 \text{ mV}$   | 44 |

|                          |                      |                                                                                                     |    |
|--------------------------|----------------------|-----------------------------------------------------------------------------------------------------|----|
| Ni-W-B (without PTE)     | 1.0 M KOH            | $\eta_{10 \text{ mA/cm}^2}=211 \text{ mV}$<br>$\eta_{100 \text{ mA/cm}^2}=367 \text{ mV}$           | 45 |
| Ni-W-B (PTE)             |                      | $\eta_{50 \text{ mA/cm}^2}=191 \text{ mV}$<br>$\eta_{100 \text{ mA/cm}^2}=344 \text{ mV}$           |    |
| CC-NC-NiFeP              | 1.0 M KOH            | $\eta_{10 \text{ mA/cm}^2}=145 \text{ mV}$                                                          | 46 |
| Fe - CoP HTPAs           | 1.0 M KOH            | $\eta_{10 \text{ mA/cm}^2}=230 \text{ mV}$                                                          | 47 |
| EP NiFe LDH/Ni-Cotton    | 1.0 M KOH            | $\eta_{50 \text{ mA/cm}^2}=214 \text{ mV}$<br>$\eta_{100 \text{ mA/cm}^2}=228 \text{ mV}$           | 48 |
| $\gamma$ -FeOOH/NF       | 1.0 M KOH            | $\eta_{10 \text{ mA/cm}^2}=286\pm 3 \text{ mV}$<br>$\eta_{100 \text{ mA/cm}^2}=316\pm 3 \text{ mV}$ | 49 |
| (N, S) -RGO/CoN          | PH=7                 | $\eta_{10 \text{ mA/cm}^2}=220 \text{ mV}$                                                          | 50 |
| MoO <sub>3</sub> @CoO/CC | 1.0 M KOH+0.5 M NaCl | $\eta_{100 \text{ mA/cm}^2}=389 \text{ mV}$                                                         | 51 |
| NiMoN@N-iFeN             | 1.0 M KOH+0.5 M NaCl | $\eta_{100 \text{ mA/cm}^2}=307 \text{ mV}$                                                         | 21 |
| CoFe-Ci@GQDs/NF          | 1.0 M KOH+0.5 M NaCl | $\eta_{100 \text{ mA/cm}^2}=255 \text{ mV}$                                                         | 52 |



## References

1. C. Yang, R. Zhao, H. Xiang, J. Wu, W. Zhong, W. Li, Q. Zhang, N. Yang and X. Li, *Advanced Energy Materials*, 2020, **10**.
2. S. Shen, Z. Wang, Z. Lin, K. Song, Q. Zhang, F. Meng, L. Gu and W. Zhong, *Advanced Materials*, 2022, **34**.
3. F. Gong, M. Liu, S. Ye, L. Gong, G. Zeng, L. Xu, X. Zhang, Y. Zhang, L. Zhou, S. Fang and J. Liu, *Advanced Functional Materials*, 2021, **31**, 2101715.
4. Y. Gu, A. Wu, Y. Jiao, H. Zheng, X. Wang, Y. Xie, L. Wang, C. Tian and H. Fu, *Angewandte Chemie International Edition*, 2021, **60**, 6673-6681.
5. L. Xie, L. Wang, X. Liu, W. Zhao, S. Liu, X. Huang and Q. Zhao, *Angewandte Chemie International Edition*, 2023, **63**.
6. D. A. Kuznetsov, Z. Chen, P. V. Kumar, A. Tsoukalou, A. Kierzkowska, P. M. Abdala, O. V. Safonova, A. Fedorov and C. R. Müller, *Journal of the American Chemical Society*, 2019, **141**, 17809-17816.
7. H. Fu, Y. Gu, A. Wu, Y. Jiao, H. Zheng, X. Wang, Y. Xie, L. Wang and C. Tian, *Angewandte Chemie International Edition*, 2020, DOI: 10.1002/anie.202016102.
8. Q. Ding, J. Zhai, M. Cabán-Acevedo, M. J. Shearer, L. Li, H. C. Chang, M. L. Tsai, D. Ma, X. Zhang, R. J. Hamers, J. H. He and S. Jin, *Advanced Materials*, 2015, **27**, 6511-6518.
9. Q. Fu, L. Yang, W. Wang, A. Han, J. Huang, P. Du, Z. Fan, J. Zhang and B. Xiang, *Advanced Materials*, 2015, **27**, 4732-4738.
10. M.-R. Gao, J.-X. Liang, Y.-R. Zheng, Y.-F. Xu, J. Jiang, Q. Gao, J. Li and S.-H. Yu, *Nature Communications*, 2015, **6**.
11. P. Y. XiaoLong Zhang, XiaoZhi Su, ShaoJin Hu, Lei Shi, YeHua Wang, PengPeng Yang, FeiYue Gao, Zhi-Zheng Wu, Li-Ping Chi, Ya-Rong Zheng, Min-Rui Gao, *Science Advances*, 2024, **9**.
12. L. Y. Xue Feng Lu, Xiong Wen Lou *Science Advances*, 2019.
13. Y. Shen, Y. Zhou, D. Wang, X. Wu, J. Li and J. Xi, *Advanced Energy Materials*, 2017, **8**.
14. L. A. King, M. A. Hubert, C. Capuano, J. Manco, N. Danilovic, E. Valle, T. R. Hellstern, K. Ayers and T. F. Jaramillo, *Nature Nanotechnology*, 2019, **14**, 1071-1074.
15. J. Cao, D. Zhang, B. Ren, P. Song and W. Xu, *Energy & Environmental Science*, 2024, **17**, 5911-5921.
16. S. Jo, M. C. Kim, K. B. Lee, H. Choi, L. Zhang and J. I. Sohn, *Advanced Energy Materials*, 2023, **13**, 2301420.
17. G. Chen, R. Lu, C. Ma, X. Zhang, Z. Wang, Y. Xiong and Y. Han, *Angewandte Chemie International Edition*, 2024, DOI: 10.1002/anie.202411603.
18. S. Kong, A. Li, J. Long, K. Adachi, D. Hashizume, Q. Jiang, K. Fushimi, H. Ooka, J. Xiao and R. Nakamura, *Nature Catalysis*, 2024, **7**, 252-261.
19. L. Wu, L. Yu, F. Zhang, B. McElhenny, D. Luo, A. Karim, S. Chen and Z. Ren, *Advanced Functional Materials*, 2020, DOI: 10.1002/adfm.202006484, 2006484.
20. Y. Kuang, M. J. Kenney, Y. Meng, W.-H. Hung, Y. Liu, J. E. Huang, R. Prasanna, P. Li, Y. Li, L. Wang, M.-C. Lin, M. D. McGehee, X. Sun and H. Dai, *Proceedings of the National Academy of Sciences*, 2019, **116**, 6624-6629.
21. L. Yu, Q. Zhu, S. Song, B. McElhenny, D. Wang, C. Wu, Z. Qin, J. Bao, Y. Yu, S. Chen and

- Z. Ren, *Nature Communications*, 2019, **10**.
22. P. Li, S. Wang, I. A. Samo, X. Zhang, Z. Wang, C. Wang, Y. Li, Y. Du, Y. Zhong, C. Cheng, W. Xu, X. Liu, Y. Kuang, Z. Lu and X. Sun, *Research*, 2020, **2020**, 1-9.
  23. H. Sun, L. Chen, Y. Lian, W. Yang, L. Lin, Y. Chen, J. Xu, D. Wang, X. Yang, M. H. Rümmerli, J. Guo, J. Zhong, Z. Deng, Y. Jiao, Y. Peng and S. Qiao, *Advanced Materials*, 2020, DOI: 10.1002/adma.202006784.
  24. X. Huang, X. Xu, X. Luan and D. Cheng, *Nano Energy*, 2020, **68**, 104332.
  25. G. Liu, Y. Wu, R. Yao, F. Zhao, Q. Zhao and J. Li, *Green Energy & Environment*, 2020, DOI: 10.1016/j.gee.2020.05.009.
  26. R. Zhang, G. Wang, Z. Wei, X. Teng, J. Wang, J. Miao, Y. Wang, F. Yang, X. Zhu, C. Chen, E. Zhou, W. Hu and X. Sun, *Journal of Materials Chemistry A*, 2021, **9**, 1221-1229.
  27. M.-Sadecq (Jie Tang) Baloguna, Anlian Pana,\*, Yexiang Tongc,\*, *Applied Catalysis B: Environmental*, 2019, **251**, 181-194.
  28. M. Cui, C. Yang, B. Li, Q. Dong, M. Wu, S. Hwang, H. Xie, X. Wang, G. Wang and L. Hu, *Advanced Energy Materials*, 2020, **11**, 2002887.
  29. C. Liang, P. Zou, A. Nairan, Y. Zhang, J. Liu, K. Liu, S. Hu, F. Kang, H. J. Fan and C. Yang, *Energy & Environmental Science*, 2020, **13**, 86-95.
  30. X. T. Wang, T. Ouyang, L. Wang, J. H. Zhong and Z. Q. Liu, *Angewandte Chemie International Edition*, 2020, **59**, 6492-6499.
  31. W. Zhou, Z. Xue, Q. Liu, Y. Li, J. Hu and G. Li, *ChemSusChem*, 2020, **13**, 5647-5653.
  32. S. Li, X. Wang, M. Li, J. Liu, C. Li, H. Wu, D. Guo, F. Ye, S. Wang, L. Cheng and A. Liu, *Electrochimica Acta*, 2019, **319**, 561-568.
  33. Z. Wang, S. Wang, L. Ma, Y. Guo, J. Sun, N. Zhang and R. Jiang, *Small*, 2021, **17**, 2006770.
  34. Y. W. Jin Yang, Jie Yang, Yajun Pang, Xinqiang Zhu, Yinzhuo Lu, Yitian Wu, Jiajie Wang, Hao Chen, Zongkui Kou, Zhehong Shen, Zhenghui Pan, John Wang, *Small*, 2021, **18**, 2106187.
  35. L. W. Luo Yu, Brian McElhenny, Shaowei Song, Dan Luo, Fanghao Zhang, Ying Yu, Shuo Chen, Zhifeng Ren, *Energy & Environmental Science*, 2020, DOI: 10.1039/D0EE00921K  
10.1039/x0xx00000x, 3439-3446.
  36. D. Yao, W. Hao, S. Weng, M. Hou, W. Cen, G. Li, Z. Chen and Y. Li, *Small*, 2022, DOI: 10.1002/smll.202106868, e2106868.
  37. F. L. FeiXiang Ma, Yingxue Diao, BinBin Zhou, Jianghua Wu, Fengwen Kang, Zebiao Li, Xufen Xiao, Peng Wang, Jian Lu, Yang Yang Li, *Nano Research*, 2021, DOI: 10.1007/s12274-021-3885-y.
  38. L. Z. Jinsong Zeng, Qian Zhou, Liling Liao, Ying Qi, Haiqing Zhou, Dongyang Li, Fengming Cai, Hui Wang, Dongsheng Tang, Fang Yu, *small*, 2021, **18**, 2104624.
  39. Z. Y. Jie Wu, Yuanyuan Zhang, Siqi Niu, Jianying Zhao, Siwei Li,\* and Ping Xu\*, *Small*, 2021, **2105150**, 1-8.
  40. J. Wang, L. Ji, S. Zuo and Z. Chen, *Advanced Energy Materials*, 2017, **7**, 1700107.
  41. M. Wang, Y. Xu, C.-K. Peng, S.-Y. Chen, Y.-G. Lin, Z. Hu, L. Sun, S. Ding, C.-W. Pao, Q. Shao and X. Huang, *Journal of the American Chemical Society*, 2021, DOI: 10.1021/jacs.1c06006, 1520-5126.
  42. F. Yu, H. Zhou, Y. Huang, J. Sun, F. Qin, J. Bao, W. A. Goddard, S. Chen and Z. Ren, *Nature Communications*, 2018, **9**.

43. J. Ding, T. Fan, K. Shen and Y. Li, *Applied Catalysis B: Environmental*, 2021, **292**, 120174.
44. B. Zhong, P. Kuang, L. Wang and J. Yu, *Applied Catalysis B: Environmental*, 2021, **299**, 120668.
45. W. Hao, R. Wu, H. Yang and Y. Guo, *Journal of Materials Chemistry A*, 2019, **7**, 12440-12445.
46. J. Bian, Z. Song, X. Li, Y. Zhang and C. Cheng, *Nanoscale*, 2020, **12**, 8443-8452.
47. E. Hu, J. Ning, D. Zhao, C. Xu, Y. Lin, Y. Zhong, Z. Zhang, Y. Wang and Y. Hu, *Small*, 2018, **14**, 1704233.
48. Y. Ko, J. Park, J. Mo, S. Lee, Y. Song, Y. Ko, H. Lee, Y. Kim, J. Huh, S. W. Lee and J. Cho, *Advanced Functional Materials*, 2021, DOI: 10.1002/adfm.202102530, 2102530.
49. K. Wang, H. Du, S. He, L. Liu, K. Yang, J. Sun, Y. Liu, Z. Du, L. Xie, W. Ai and W. Huang, *Advanced Materials*, 2021, **33**, 2005587.
50. D. Guo, Z. Zeng, Z. Wan, Y. Li, B. Xi and C. Wang, *Advanced Functional Materials*, 2021, **31**, 2101324.
51. L. Zhou, D. Guo, L. Wu, Z. Guan, C. Zou, H. Jin, G. Fang, X. a. Chen and S. Wang, *Nature Communications*, 2024, **15**.
52. R. Fan, C. Liu, Z. Li, H. Huang, J. Feng, Z. Li and Z. Zou, *Nature Sustainability*, 2024, **7**, 158-167.
